# Supplementary material for: Prolonged Exposure to Simulated Microgravity Changes Release of Small Extracellular Vesicle in Breast Cancer Cells
Source: MDPI journal article supplement (doi:10.3390/ijms232416095), 2022-12-17
Supplement: s1 [file s1]

**Supplemental Table S1.** Particle size distribution baseline corrected, all sample sets (50 – 200nm).

| 5d 1g     |      |     |     |      |     |     |      |     |     |
|-----------|------|-----|-----|------|-----|-----|------|-----|-----|
|           | CD63 |     |     | CD81 |     |     | CD9  |     |     |
| Size (nm) | A    | B   | C   | A    | B   | C   | A    | B   | C   |
| 50        | 372  | 354 | 385 | 200  | 87  | 114 | 461  | 241 | 343 |
| 55        | 634  | 473 | 589 | 444  | 181 | 210 | 1041 | 425 | 682 |
| 60        | 99   | 76  | 88  | 116  | 77  | 83  | 322  | 112 | 224 |
| 65        | 43   | 35  | 45  | 72   | 33  | 57  | 165  | 63  | 130 |
| 70        | 22   | 18  | 21  | 36   | 33  | 33  | 101  | 31  | 76  |
| 75        | 10   | 16  | 17  | 24   | 22  | 26  | 65   | 20  | 48  |
| 80        | 7    | 12  | 7   | 19   | 17  | 20  | 43   | 11  | 22  |
| 85        | 4    | 8   | 5   | 9    | 8   | 8   | 28   | 12  | 10  |
| 90        | 3    | 5   | 6   | 9    | 7   | 5   | 14   | 9   | 14  |
| 95        | 6    | 7   | 6   | 7    | 5   | 4   | 9    | 7   | 9   |
| 100       | 5    | 3   | 9   | 5    | 2   | 6   | 8    | 0   | 6   |
| 105       | 2    | 2   | 5   | 5    | 2   | 5   | 10   | 5   | 1   |
| 110       | 2    | 0   | 3   | 3    | 2   | 1   | 2    | 2   | 5   |
| 115       | 1    | 5   | 3   | 1    | 2   | 2   | 5    | 4   | 5   |
| 120       | 1    | 1   | 1   | 7    | 0   | 6   | 5    | 2   | 1   |
| 125       | 0    | 2   | 1   | 4    | 0   | 2   | 1    | 4   | 1   |
| 130       | 3    | 0   | 1   | 2    | 0   | 0   | 3    | 1   | 2   |
| 135       | 1    | 2   | 1   | 0    | 0   | 1   | 2    | 1   | 0   |
| 140       | 3    | 2   | 1   | 1    | 1   | 0   | 2    | 1   | 2   |
| 145       | 0    | 1   | 0   | 1    | 0   | 2   | 0    | 2   | 1   |
| 150       | 2    | 0   | 3   | 2    | 2   | 2   | 0    | 0   | 1   |
| 155       | 0    | 1   | 1   | 1    | 0   | 1   | 1    | 0   | 1   |
| 160       | 0    | 3   | 0   | 2    | 2   | 1   | 2    | 0   | 0   |
| 165       | 0    | 0   | 0   | 1    | 0   | 1   | 1    | 1   | 0   |
| 170       | 0    | 0   | 0   | 0    | 0   | 0   | 0    | 0   | 0   |
| 175       | 0    | 1   | 1   | 1    | 0   | 0   | 1    | 0   | 0   |
| 180       | 0    | 1   | 1   | 0    | 1   | 1   | 0    | 0   | 1   |
| 185       | 0    | 0   | 0   | 0    | 0   | 1   | 0    | 1   | 0   |
| 190       | 2    | 0   | 0   | 1    | 0   | 1   | 0    | 0   | 1   |
| 195       | 0    | 0   | 1   | 0    | 0   | 1   | 1    | 0   | 0   |
| 200       | 1    | 1   | 1   | 0    | 0   | 0   | 1    | 0   | 0   |

| 5d RPM    |      |      |     |      |     |     |      |      |     |
|-----------|------|------|-----|------|-----|-----|------|------|-----|
|           | CD63 |      |     | CD81 |     |     | CD9  |      |     |
| Size (nm) | A    | B    | C   | A    | B   | C   | A    | B    | C   |
| 50        | 538  | 607  | 328 | 234  | 158 | 84  | 440  | 489  | 285 |
| 55        | 1147 | 1249 | 449 | 715  | 539 | 157 | 1064 | 1070 | 528 |
| 60        | 398  | 374  | 67  | 425  | 342 | 56  | 471  | 430  | 176 |
| 65        | 249  | 278  | 29  | 366  | 285 | 39  | 299  | 221  | 97  |
| 70        | 143  | 218  | 12  | 294  | 200 | 22  | 211  | 147  | 41  |
| 75        | 118  | 150  | 3   | 192  | 145 | 7   | 138  | 101  | 36  |
| 80        | 94   | 146  | 9   | 119  | 133 | 9   | 85   | 79   | 18  |

|     |    |    |   |    |    |   |    |    |    |
|-----|----|----|---|----|----|---|----|----|----|
| 85  | 60 | 97 | 5 | 71 | 87 | 1 | 46 | 42 | 14 |
| 90  | 49 | 76 | 1 | 44 | 71 | 1 | 38 | 42 | 8  |
| 95  | 43 | 57 | 1 | 31 | 49 | 1 | 25 | 29 | 6  |
| 100 | 40 | 39 | 2 | 26 | 32 | 4 | 13 | 21 | 5  |
| 105 | 33 | 46 | 0 | 12 | 24 | 2 | 8  | 15 | 5  |
| 110 | 23 | 38 | 2 | 8  | 18 | 1 | 10 | 14 | 7  |
| 115 | 9  | 22 | 1 | 6  | 21 | 0 | 6  | 7  | 4  |
| 120 | 17 | 29 | 0 | 2  | 16 | 1 | 9  | 3  | 2  |
| 125 | 11 | 18 | 0 | 3  | 14 | 0 | 4  | 7  | 2  |
| 130 | 12 | 25 | 2 | 5  | 15 | 1 | 5  | 5  | 2  |
| 135 | 12 | 9  | 1 | 3  | 9  | 0 | 3  | 6  | 0  |
| 140 | 15 | 7  | 0 | 2  | 13 | 0 | 3  | 5  | 1  |
| 145 | 12 | 6  | 0 | 3  | 5  | 1 | 2  | 5  | 1  |
| 150 | 8  | 4  | 1 | 3  | 14 | 0 | 1  | 4  | 1  |
| 155 | 5  | 2  | 0 | 1  | 5  | 0 | 0  | 2  | 1  |
| 160 | 7  | 1  | 1 | 5  | 3  | 0 | 3  | 3  | 0  |
| 165 | 7  | 8  | 0 | 0  | 2  | 0 | 2  | 1  | 0  |
| 170 | 10 | 5  | 1 | 1  | 6  | 0 | 1  | 2  | 0  |
| 175 | 6  | 5  | 0 | 3  | 2  | 1 | 1  | 1  | 0  |
| 180 | 5  | 5  | 0 | 1  | 1  | 0 | 1  | 2  | 0  |
| 185 | 2  | 5  | 0 | 0  | 0  | 0 | 2  | 2  | 0  |
| 190 | 3  | 4  | 0 | 2  | 1  | 0 | 1  | 0  | 0  |
| 195 | 3  | 5  | 0 | 1  | 0  | 0 | 0  | 1  | 0  |
| 200 | 3  | 2  | 0 | 2  | 1  | 0 | 0  | 0  | 0  |

| 10d 1g    |      |     |     |      |     |    |     |     |     |
|-----------|------|-----|-----|------|-----|----|-----|-----|-----|
|           | CD63 |     |     | CD81 |     |    | CD9 |     |     |
| Size (nm) | A    | B   | C   | A    | B   | C  | A   | B   | C   |
| 50        | 359  | 281 | 244 | 81   | 169 | 60 | 274 | 382 | 325 |
| 55        | 531  | 564 | 378 | 121  | 510 | 83 | 498 | 887 | 561 |
| 60        | 60   | 228 | 55  | 37   | 294 | 26 | 129 | 395 | 163 |
| 65        | 21   | 154 | 27  | 22   | 230 | 18 | 52  | 243 | 83  |
| 70        | 10   | 124 | 12  | 13   | 128 | 6  | 40  | 150 | 41  |
| 75        | 15   | 98  | 14  | 9    | 99  | 3  | 15  | 110 | 26  |
| 80        | 3    | 60  | 6   | 4    | 78  | 1  | 15  | 90  | 24  |
| 85        | 4    | 50  | 6   | 8    | 66  | 1  | 12  | 67  | 14  |
| 90        | 2    | 33  | 5   | 4    | 45  | 1  | 9   | 53  | 8   |
| 95        | 4    | 32  | 2   | 2    | 36  | 0  | 5   | 39  | 9   |
| 100       | 3    | 21  | 2   | 3    | 22  | 0  | 5   | 27  | 4   |
| 105       | 2    | 19  | 1   | 1    | 26  | 1  | 3   | 24  | 3   |
| 110       | 2    | 15  | 3   | 1    | 23  | 2  | 0   | 14  | 2   |
| 115       | 0    | 5   | 0   | 2    | 23  | 1  | 0   | 11  | 2   |
| 120       | 1    | 7   | 0   | 1    | 13  | 0  | 0   | 11  | 1   |
| 125       | 0    | 4   | 0   | 0    | 5   | 0  | 1   | 10  | 2   |
| 130       | 1    | 5   | 1   | 0    | 10  | 0  | 1   | 2   | 1   |
| 135       | 0    | 2   | 1   | 0    | 6   | 0  | 1   | 4   | 0   |

|     |   |   |   |   |   |   |   |   |   |
|-----|---|---|---|---|---|---|---|---|---|
| 140 | 1 | 3 | 0 | 0 | 6 | 1 | 0 | 3 | 0 |
| 145 | 0 | 4 | 1 | 2 | 5 | 1 | 0 | 5 | 0 |
| 150 | 0 | 4 | 0 | 1 | 0 | 1 | 1 | 2 | 0 |
| 155 | 0 | 2 | 1 | 0 | 4 | 0 | 0 | 3 | 2 |
| 160 | 0 | 3 | 0 | 0 | 7 | 0 | 0 | 0 | 2 |
| 165 | 0 | 1 | 0 | 0 | 1 | 0 | 0 | 2 | 0 |
| 170 | 0 | 1 | 0 | 1 | 1 | 0 | 0 | 1 | 0 |
| 175 | 0 | 2 | 0 | 0 | 1 | 0 | 0 | 2 | 0 |
| 180 | 0 | 3 | 0 | 0 | 1 | 0 | 0 | 0 | 1 |
| 185 | 0 | 0 | 0 | 0 | 2 | 0 | 0 | 1 | 0 |
| 190 | 0 | 1 | 0 | 0 | 1 | 1 | 0 | 0 | 0 |
| 195 | 1 | 1 | 1 | 0 | 1 | 0 | 0 | 0 | 1 |
| 200 | 0 | 1 | 0 | 0 | 0 | 0 | 0 | 1 | 0 |

| 10d RPM   |      |     |     |      |     |     |     |     |     |
|-----------|------|-----|-----|------|-----|-----|-----|-----|-----|
|           | CD63 |     |     | CD81 |     |     | CD9 |     |     |
| Size (nm) | A    | B   | C   | A    | B   | C   | A   | B   | C   |
| 50        | 425  | 445 | 447 | 127  | 182 | 96  | 374 | 399 | 378 |
| 55        | 586  | 815 | 684 | 211  | 454 | 265 | 653 | 856 | 742 |
| 60        | 91   | 302 | 106 | 79   | 204 | 68  | 195 | 357 | 195 |
| 65        | 46   | 186 | 42  | 43   | 181 | 26  | 102 | 217 | 104 |
| 70        | 27   | 140 | 23  | 28   | 108 | 12  | 58  | 131 | 62  |
| 75        | 12   | 103 | 19  | 12   | 74  | 16  | 47  | 94  | 38  |
| 80        | 8    | 100 | 10  | 12   | 75  | 4   | 22  | 92  | 16  |
| 85        | 7    | 76  | 9   | 11   | 59  | 1   | 16  | 46  | 12  |
| 90        | 3    | 40  | 4   | 4    | 35  | 1   | 20  | 48  | 10  |
| 95        | 6    | 42  | 4   | 4    | 30  | 1   | 8   | 33  | 8   |
| 100       | 4    | 31  | 1   | 3    | 21  | 2   | 7   | 26  | 3   |
| 105       | 3    | 28  | 6   | 3    | 24  | 2   | 6   | 18  | 6   |
| 110       | 3    | 16  | 5   | 1    | 9   | 1   | 3   | 14  | 4   |
| 115       | 1    | 13  | 1   | 2    | 10  | 1   | 5   | 9   | 4   |
| 120       | 1    | 13  | 2   | 1    | 6   | 2   | 3   | 9   | 2   |
| 125       | 4    | 4   | 0   | 0    | 5   | 1   | 3   | 10  | 2   |
| 130       | 2    | 9   | 3   | 3    | 3   | 1   | 1   | 9   | 0   |
| 135       | 0    | 4   | 1   | 1    | 8   | 0   | 0   | 7   | 2   |
| 140       | 0    | 5   | 1   | 1    | 0   | 0   | 0   | 3   | 1   |
| 145       | 0    | 8   | 0   | 0    | 4   | 0   | 0   | 4   | 0   |
| 150       | 1    | 1   | 2   | 0    | 3   | 0   | 1   | 2   | 1   |
| 155       | 1    | 4   | 1   | 0    | 1   | 0   | 0   | 1   | 1   |
| 160       | 2    | 2   | 1   | 3    | 2   | 0   | 0   | 0   | 2   |
| 165       | 0    | 3   | 1   | 1    | 3   | 0   | 1   | 2   | 0   |
| 170       | 0    | 0   | 0   | 2    | 2   | 0   | 1   | 2   | 2   |
| 175       | 1    | 2   | 0   | 0    | 1   | 0   | 2   | 2   | 0   |
| 180       | 0    | 0   | 0   | 0    | 0   | 0   | 0   | 1   | 0   |
| 185       | 1    | 1   | 0   | 0    | 0   | 0   | 0   | 1   | 1   |
| 190       | 0    | 1   | 0   | 0    | 2   | 0   | 1   | 1   | 0   |
